# Supplementary material
Source: Elsevier journal article supplement (https://www.sciencedirect.com/science/article/pii/S0212656715000074)
Supplement: mmc1 [file S0212656715000074:mmc1.docx]

**Anexo**

Cuestionario autoadministrado

| **Datos personales** | | | |
| --- | --- | --- | --- |
| Edad | | | Sexo |
| Especialidad | | | Año de formación |
| Nacionalidad | | | Provincia |
| **Consumo de alcohol** | | | |
| ¿Actualmente consumes alcohol? | ⌂ No consumo  ⌂ Consumo de forma ocasional  ⌂ Consumo en ratos de ocio (p.e. fin de semana)  ⌂ Consumo todos los días | | |
| Señala cuántos vasos de alcohol consumes en una semana:  ⌂ Cerveza_______ ⌂ Vino _______ ⌂ Licores _______ ⌂ Combinados _______ | | | |
| ***Contesta si tomas alcohol:*** Edad del primer consumo | | | |
| **Consumo de tabaco** | | | |
| ¿Actualmente consumes tabaco? | ⌂ No consumo  ⌂ Consumo de forma ocasional  ⌂ Consumo en ratos de ocio (p.e. fin de semana)  ⌂ Consumo todos los días | | |
| ***Continúa si eres fumador*** | | | |
| Edad del primer consumo | | ¿Cuántos cigarrillos consumes diariamente? | |
| ¿Encuentras dificultad para abstenerte de fumar en lugares donde está prohibido (cines, hospitales..)? ⌂ Sí ⌂ No | | | |
| ¿Qué cigarrillo te costaría más dejar de fumar? ⌂ El primero de la mañana ⌂ Cualquier otro | | | |
| ¿Fumas más durante las primeras horas de la mañana que durante el resto del día? ⌂ Sí ⌂ No | | | |
| ¿Fumas cuando no te encuentras bien o cuando estás enfermo? ⌂ Sí ⌂ No | | | |
| **Consumo de otras drogas** | | | |
| ¿Actualmente consumes algún otro tipo de droga? ⌂ Sí ⌂ No | | | |
| Señala qué tipo de droga consumes: _____________ | | | |
| **Consejo contra las drogas en tu práctica clínica**  ¿Aconsejas o informas a tus pacientes contra los siguientes consumos? | | | |
| ***Consumo de alcohol***  ⌂Nunca/casi nunca ⌂A veces ⌂ La mitad de las veces ⌂ A menudo ⌂ Casi siempre/siempre | | | |
| ***Consumo de tabaco***  ⌂Nunca/casi nunca ⌂A veces ⌂ La mitad de las veces ⌂ A menudo ⌂ Casi siempre/siempre | | | |
| ***Consumo de otras drogas***  ⌂Nunca/casi nunca ⌂A veces ⌂ La mitad de las veces ⌂ A menudo ⌂ Casi siempre/siempre | | | |
